# Supplementary material
Source: Springer Nature journal article supplement (https://www.springermedizin.de/resource/supplementary/12950_2007_67_MOESM4_ESM.pdf/9557934)

A) - No feG Pretreatment

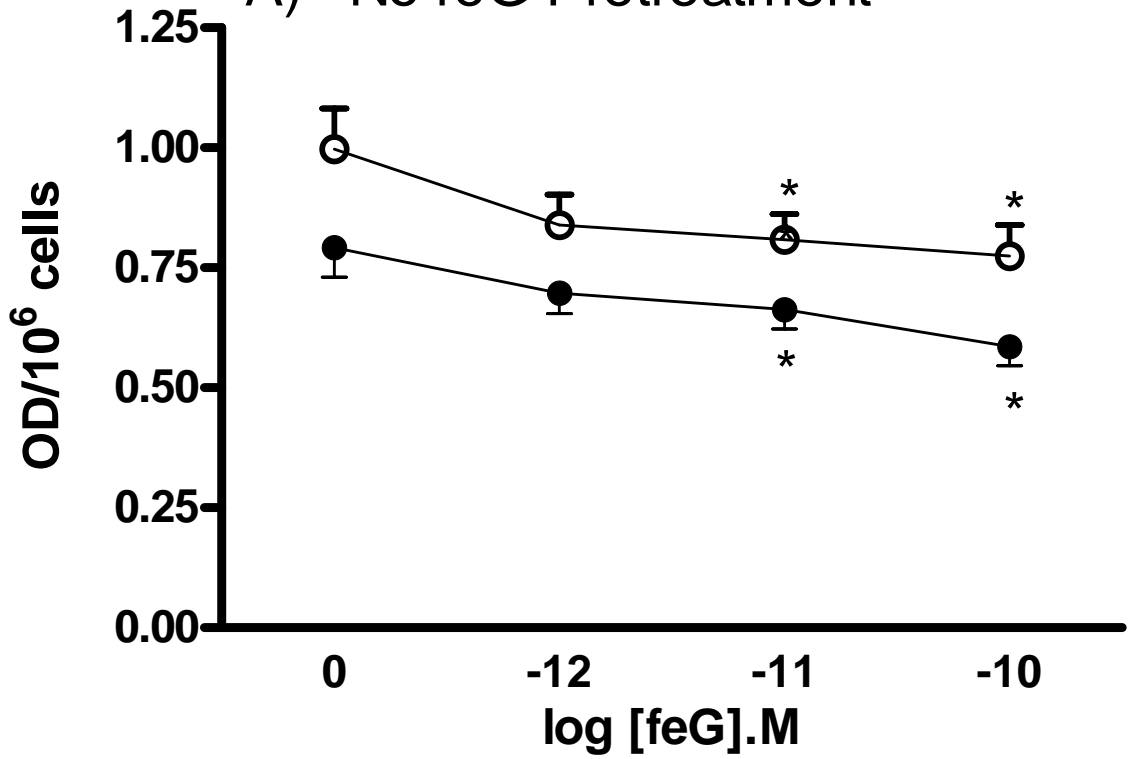

B) - feG Pretreatment

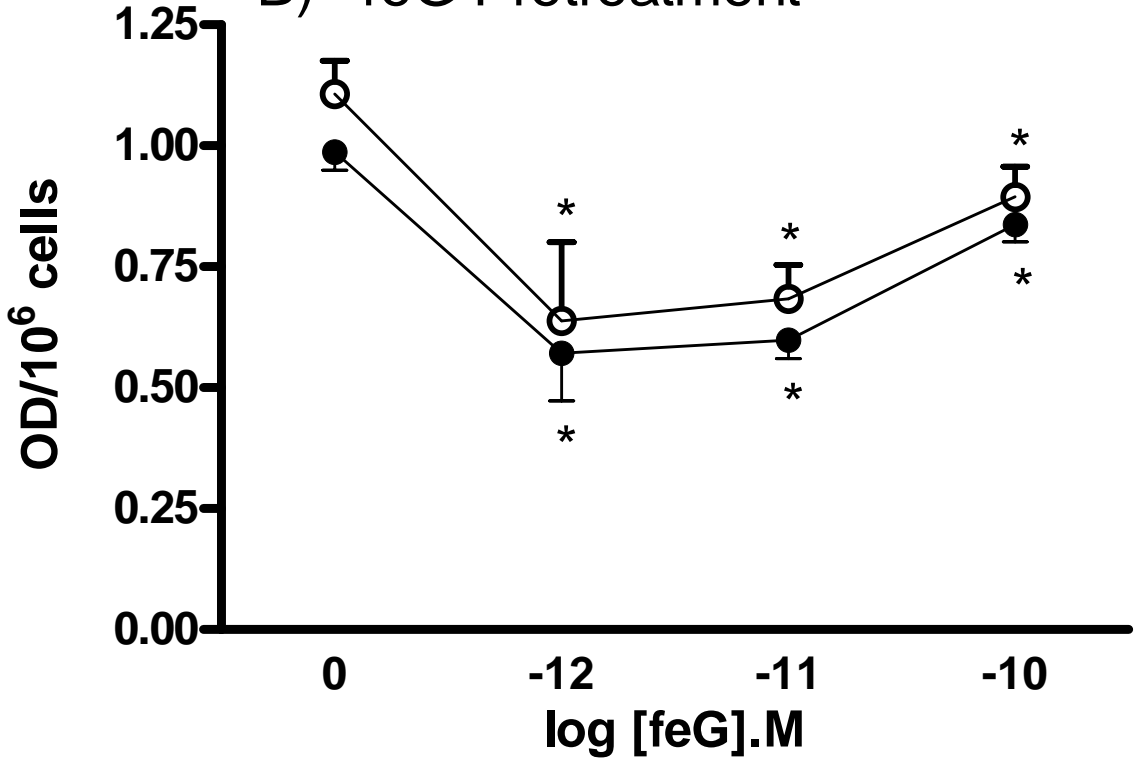

Supplement: MOESM4 [file 9557934]
